# Supplementary material for: A Novel Multifunctional β-N-Acetylhexosaminidase Revealed through Metagenomics of an Oil-Spilled Mangrove
Source: MDPI journal article supplement (doi:10.3390/bioengineering4030062), 2017-07-09
Supplement: s1 [file s1]

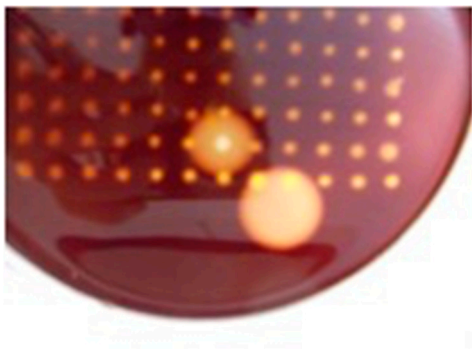

Figure S1.

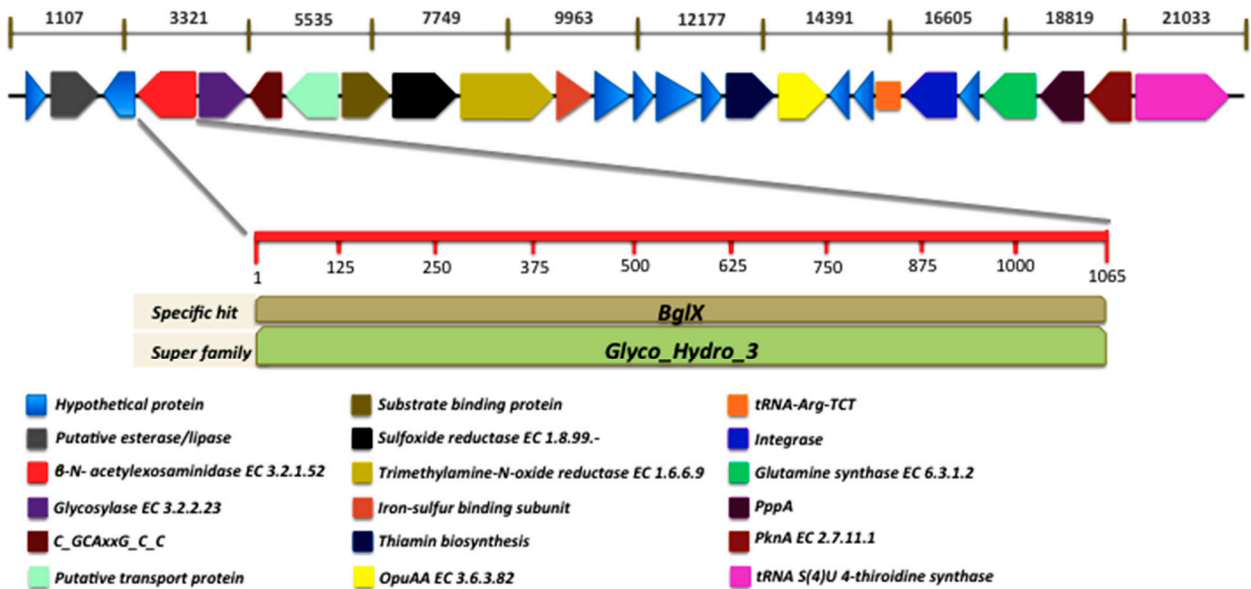

Figure S2.

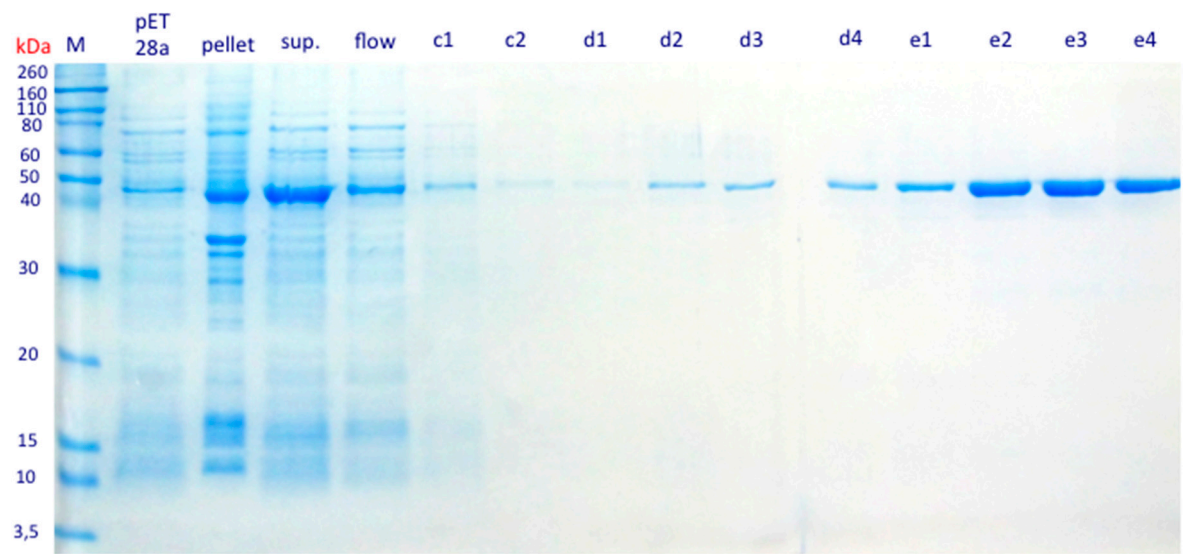

Figure S3.

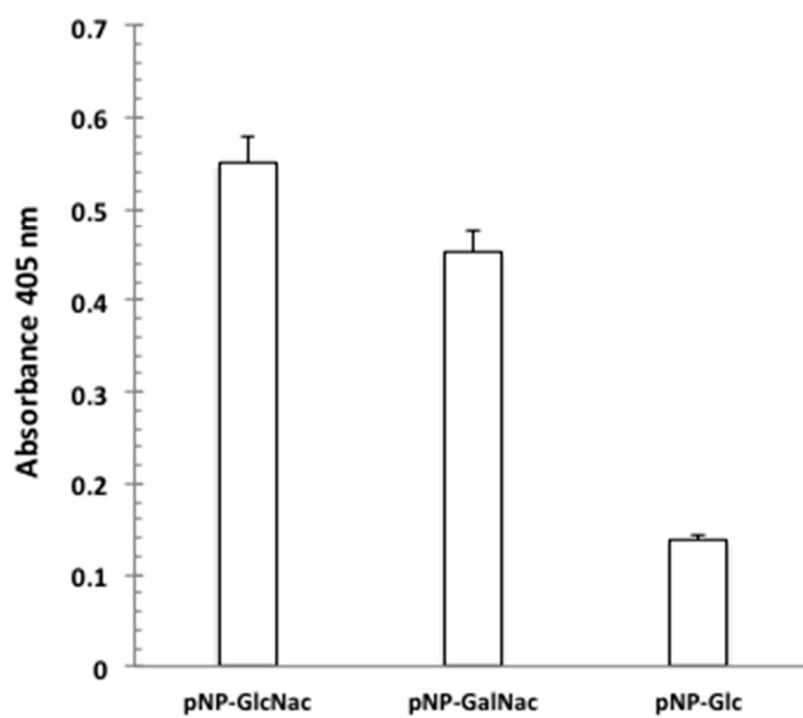

Figure S4.
